# Supplementary material for: Association between diverticular disease and colorectal cancer: a bidirectional mendelian randomization study
Source: BMC Cancer. 2023 Feb 10;23:137. doi: 10.1186/s12885-023-10606-x (PMC9912649; doi:10.1186/s12885-023-10606-x)
Supplement: Supplementary file 3 — Supplementary Material 3 [file 12885_2023_10606_MOESM3_ESM.xlsx]

## Sheet: Supplementary File legends
Supplementary Files
Supplementary Table 1. The used instrument variables for diverticular disease.
Supplementary Table 2. The used instrument variables for diverticular disease with replicated estimates in the original GWAS.
Supplementary Table 3. The used instrument variables for colorectal cancer.
Supplementary Table 4. Outcome data sources of outcome and download links.
Supplementary Table 5. The SNPs used in Mendelian randomization analysis and colorectal cancer estimates in the FinnGen Biobank.
Supplementary Table 6. The SNPs used in Mendelian randomization analysis and colorectal cancer estimates in the UK Biobank.
Supplementary Table 7. The SNPs used in Mendelian randomization analysis and colon cancer estimates in the FinnGen Biobank.
Supplementary Table 8. The SNPs used in Mendelian randomization analysis and colon cancer estimates in the UK Biobank.
Supplementary Table 9. The SNPs used in Mendelian randomization analysis and rectum cancer estimates in the FinnGen Biobank.
Supplementary Table 10. The SNPs used in Mendelian randomization analysis and rectum cancer estimates in the UK Biobank.
Supplementary Table 11. The SNPs used in Mendelian randomization analysis (with replicated estimates from original GWAS) and colorectal cancer estimates in the UK Biobank.
Supplementary Table 12. The SNPs used in Mendelian randomization analysis (with replicated estimates from original GWAS) and colon cancer estimates in the UK Biobank.
Supplementary Table 13. The SNPs used in Mendelian randomization analysis (with replicated estimates from original GWAS) and rectum cancer estimates in the UK Biobank.
Supplementary Table 14. The SNPs used for colorectal cancer in reverse Mendelian randomization analysis and diverticular disease estimates.
Supplementary Table 15. The estimates of MR analysis by using the replicated estimates from diverticular disease GWAS.
Supplementary Table 16. The results of MR-PRESSO for replication stage.
Supplementary Figure 1. Scatter plots of Mendelian randomization analysis for replication stage.
Supplementary File 1. The code used for MR analysis.
Supplementary File 2. The STORBE-MR checklist.

## Sheet: Table S1
Supplementary Table 1. The used instrument variables for diverticular disease.
rsids	Chr	Position	pval.exposure	beta.exposure	effect_allele.exposure	other_allele.exposure	eaf.exposure	se.exposure	r2	F
rs10471645	5	64295363	2.1e-11	0.0293838	C	T	0.175	0.0101	0.000249309	112.49
rs10472291	5	37772780	3.8e-11	0.0253059	C	A	0.346	0.00881304	0.000289819	130.774
rs112609918	7	73427600	2.9e-12	0.0569049	A	T	0.052	0.0187653	0.000319257	144.062
rs1473813	13	33727605	2.9e-08	-0.0177288	G	A	0.38	0.0073588	0.000148102	66.8185
rs17309930	11	27748493	6.8e-17	-0.0362122	C	A	0.195	0.00998528	0.000411689	185.788
rs1802575	2	56093204	3.7e-19	0.045323	G	C	0.145	0.0116661	0.000509332	229.875
rs1888693	10	18440444	2.7e-10	-0.0222764	G	A	0.332	0.00812233	0.000220107	99.3116
rs1973232	17	76856966	2.9e-09	0.0253059	A	G	0.193	0.00981427	0.000199482	90.0036
rs2049865	8	116588546	4.9e-08	-0.0177288	A	C	0.41	0.00748354	0.000152063	68.6055
rs2056544	15	76826003	9.8e-11	-0.0222764	A	G	0.412	0.00792786	0.000240433	108.485
rs208814	20	37493576	9e-09	0.0211893	G	A	0.366	0.00848735	0.000208369	94.0143
rs2131755	16	84857378	1.5e-11	0.0253059	A	G	0.421	0.00863512	0.0003122	140.877
rs2280028	16	86233413	4.1e-12	-0.0315171	G	A	0.132	0.0104664	0.000227622	102.703
rs2784255	1	221066373	2e-08	-0.0177288	T	C	0.473	0.00727405	0.000156696	70.6963
rs3113037	7	96078564	1e-11	0.0253059	C	T	0.244	0.00856077	0.000236257	106.6
rs34126945	5	122329729	1.2e-08	-0.0177288	A	G	0.323	0.0071621	0.000137461	62.0166
rs3732760	3	151074941	1.7e-11	0.0253059	A	C	0.387	0.00865846	0.000303839	137.103
rs3775010	4	95821419	6.8e-10	0.0211893	T	C	0.37	0.00790678	0.000209317	94.4422
rs387505	15	68238462	2.9e-08	0.0170333	C	T	0.449	0.00707015	0.000143558	64.7679
rs4132788	4	15386383	1.1e-08	0.0211893	C	T	0.27	0.0085379	0.00017699	79.854
rs4333882	1	234352899	2.5e-24	0.0413927	A	G	0.207	0.00936483	0.000562498	253.884
rs4802297	19	38738130	2e-16	0.0253059	C	G	0.498	0.00708688	0.000320188	144.482
rs4871180	8	122259074	1.1e-09	0.0253059	C	T	0.256	0.0095614	0.000243941	110.068
rs505922	9	136149229	4.5e-15	-0.0268721	T	C	0.302	0.00789212	0.000304437	137.372
rs6001870	22	40695172	4.3e-09	0.0211893	A	C	0.361	0.00830864	0.000207143	93.4612
rs60869342	8	120456193	4.4e-13	-0.0268721	A	T	0.23	0.0085432	0.000255772	115.408
rs61814883	1	151970629	3.2e-11	-0.0222764	G	A	0.286	0.00772832	0.000202667	91.4412
rs61823192	1	219294570	4.6e-14	-0.0757207	C	T	0.025	0.0231152	0.000279514	126.123
rs62125298	2	18937283	1e-08	-0.0268721	G	T	0.161	0.0107971	0.000195084	88.0192
rs6714546	2	33361425	2.4e-08	0.0211893	G	A	0.301	0.00874317	0.000188933	85.243
rs6734367	2	144314247	4.4e-55	0.0681859	G	T	0.201	0.0100437	0.00149335	674.653
rs7077800	10	25819228	1.7e-22	-0.0315171	C	T	0.457	0.00743683	0.000492989	222.496
rs7098322	10	101391169	6e-14	0.0374265	T	C	0.134	0.011478	0.000325096	146.697
rs71472433	15	40649609	6.1e-11	0.0293838	A	C	0.176	0.0103434	0.000250429	112.996
rs7609897	3	15502681	5.6e-22	-0.0409586	G	T	0.199	0.00978669	0.000534818	241.384
rs7624168	3	5843836	2.3e-08	-0.0222764	G	A	0.215	0.00917956	0.000167505	75.5737
rs7990	6	32609965	1.4e-08	0.0293838	C	A	0.105	0.0119256	0.000162277	73.2147
rs8074740	17	42312778	2.4e-10	0.0211893	G	A	0.334	0.00770377	0.000199749	90.124
rs875107	11	70005374	3.7e-09	0.0211893	A	C	0.496	0.00827362	0.000224479	101.284
rs9482094	6	98364895	1.6e-11	-0.0222764	G	A	0.359	0.00761194	0.000228387	103.048
rs9520339	13	107897823	1.1e-14	-0.0315171	C	T	0.227	0.00939168	0.000348599	157.307
rs9555371	13	108215404	1.2e-13	-0.0315171	A	G	0.187	0.00978466	0.000302032	136.287
rs9960286	18	20028737	2.3e-10	0.0253059	A	G	0.254	0.00919091	0.000242686	109.502

## Sheet: Table S2
Supplementary Table 2. The used instrument variables for diverticular disease with replicated estimates in the original GWAS.
rsids	Chr	Position	Gene	Alt	Ref	P.value	OR	LCI	UCI	beta	se
rs10471645	5	64295363	CWC27	C	T	1.5e-07	1.29	1.17	1.42	0.254642	0.0484796
rs10472291	5	37772780	GDNF	C	A	0.106	1.08	0.98	1.17	0.076961	0.0476116
rs111316530	21	47399453	COL6A1	GTGTGTCA	-	0.003	0.9	0.83	0.96	-0.105361	0.035502
rs112609918	7	73427600	ELN	A	T	0.009	0.89	0.81	0.97	-0.116534	0.0446139
rs139760870	10	124168942	PLEKHA1	G	A	0.111	1.1	0.98	1.25	0.0953102	0.0598038
rs1473813	13	33727605	STARD13	G	A	0.335	0.96	0.88	1.04	-0.040822	0.0423424
rs147496465	9	78739440	PCSK5	TCAGGAGG	-	0.029	1.08	1.01	1.17	0.076961	0.0352469
rs17309930	11	27748493	BDNF	C	A	0.011	0.91	0.84	0.98	-0.0943107	0.0370908
rs1802575	2	56093204	EFEMP1	G	C	0.00039	1.14	1.06	1.23	0.131028	0.0369431
rs1888693	10	18440444	CACNB2	G	A	0.018	0.9	0.83	0.98	-0.105361	0.0445383
rs1973232	17	76856966	TIMP2	A	G	3.5e-07	0.79	0.72	0.87	-0.235722	0.0462716
rs2049865	8	116588546	TRPS1	A	C	0.082	0.8	0.62	1.03	-0.223144	0.128303
rs2056544	15	76826003	SCAPER	A	G	0.076	1.11	0.99	1.25	0.10436	0.0588149
rs208814	20	37493576	PPP1R16B	G	A	0.0003	0.85	0.78	0.93	-0.162519	0.0449531
rs2131755	16	84857378	CRISPLD2	A	G	0.009	1.16	1.04	1.3	0.14842	0.0568212
rs2280028	16	86233413	LINC01082	G	A	0.004	1.39	1.11	1.74	0.329304	0.114415
rs2784255	1	221066373	HLX	T	C	0.019	0.88	0.79	0.98	-0.127833	0.0545008
rs3113037	7	96078564	SEM1	C	T	0.095	1.07	0.99	1.15	0.0676586	0.040524
rs34126945	5	122329729	SNX24	A	G	0.022	0.91	0.85	0.99	-0.0943107	0.0411771
rs3732760	3	151074941	P2RY12	A	C	0.026	1.09	1.01	1.18	0.0861777	0.0387105
rs3775010	4	95821419	BMPR1B	T	C	0.579	1.03	0.93	1.14	0.0295588	0.0532739
rs387505	15	68238462	PIAS1	C	T	0.02	1.1	1.02	1.19	0.0953102	0.0409699
rs4132788	4	15386383	C1QTNF7	C	T	0.003	0.89	0.82	0.96	-0.116534	0.0392669
rs4333882	1	234352899	SLC35F3	A	G	0.143	1.06	0.98	1.14	0.0582689	0.0397819
rs4802297	19	38738130	PPP1R14A	C	G	0.014	1.14	1.03	1.27	0.131028	0.0533228
rs4871180	8	122259074	HAS2	C	T	0.039	0.93	0.86	1	-0.0725707	0.035157
rs505922	9	136149229	ABO	T	C	0.07	1.08	0.99	1.18	0.076961	0.0424751
rs575909118	11	15065235	CALCB	-	T	0.002	1.14	1.05	1.24	0.131028	0.0424008
rs6001870	22	40695172	TNRC6B	A	C	0.077	1.07	0.99	1.16	0.0676586	0.0382606
rs60869342	8	120456193	NOV	A	T	0.003	0.89	0.82	0.96	-0.116534	0.0392669
rs61814883	1	151970629	S100A10	G	A	0.021	1.1	1.01	1.19	0.0953102	0.0412958
rs61823192	1	219294570	LYPLAL1-AS1	C	T	0.364	1.04	0.96	1.13	0.0392207	0.0432056
rs62125298	2	18937283	NT5C1B	G	T	0.818	0.99	0.92	1.07	-0.0100503	0.0436747
rs6714546	2	33361425	LTBP1	G	A	0.764	1.01	0.92	1.11	0.00995033	0.0331421
rs6734367	2	144314247	ARHGAP15	G	T	0.001	1.14	1.05	1.23	0.131028	0.0398198
rs7077800	10	25819228	GPR158	C	T	0.025	1.09	1.01	1.18	0.0861777	0.0384481
rs7098322	10	101391169	SLC25A28	T	C	0.637	1.02	0.94	1.1	0.0198026	0.0419638
rs71472433	15	40649609	PHGR1/DISP2	A	C	0.714	0.98	0.9	1.08	-0.0202027	0.055125
rs72221075	7	102474903	FBXL13	TA	-	0.019	1.1	1.02	1.2	0.0953102	0.0406348
rs7609897	3	15502681	COLQ	G	T	0.079	0.93	0.86	1.01	-0.0725707	0.0413151
rs7624168	3	5843836	EDEM1	G	A	0.739	1.02	0.92	1.12	0.0198026	0.0594356
rs7990	6	32609965	HLA-DQA1	C	A	0.318	0.91	0.76	1.09	-0.0943107	0.0944451
rs8074740	17	42312778	UBTF	G	A	0.023	0.92	0.85	0.99	-0.0833816	0.0366765
rs875107	11	70005374	ANO1	A	C	0.036	0.91	0.83	0.99	-0.0943107	0.0449757
rs9482094	6	98364895	LOC101927314	G	A	0.552	1.03	0.94	1.11	0.0295588	0.0496982
rs9520339	13	107897823	FAM155A_1	C	T	0.507	0.98	0.9	1.05	-0.0202027	0.0304479
rs9555371	13	108215404	FAM155A_2*	A	G	0.009	1.1	1.02	1.18	0.0953102	0.0364886
rs9960286	18	20028737	CTAGE1	A	G	0.55	0.98	0.91	1.05	-0.0202027	0.0337973

## Sheet: Table S3
Supplementary Table 3. The used instrument variables for colorectal cancer.
SNP	effect_allele.exposure	other_allele.exposure	pval.exposure	beta.exposure	eaf.exposure	se.exposure	r2	F
rs11874392	A	T	3.8e-74	0.1606	0.545	0.00881606	0.0127917	1625.84
rs3087967	T	C	1.9e-31	0.1122	0.2911	0.00961763	0.00519569	655.334
rs2293581	A	G	2.3e-29	0.1248	0.2116	0.0110927	0.00519663	655.453
rs16892766	C	A	7.3e-28	0.2099	0.0829	0.0191839	0.00669925	846.258
rs1741640	C	T	1.1e-26	0.1146	0.7652	0.0107175	0.00471924	594.955
rs11255841	T	A	1.3e-25	0.1064	0.703	0.0101708	0.00472743	595.992
rs12514517	A	G	9.3e-25	0.1013	0.288	0.00986054	0.00420844	530.286
rs12372718	G	A	1.9e-23	0.0896	0.3924	0.00897963	0.00382818	482.187
rs35107139	C	A	2.1e-23	0.0912	0.4235	0.00914909	0.00406137	511.678
rs28840750	T	G	3.7e-23	0.1939	0.948	0.0195626	0.00370678	466.839
rs2735940	G	A	1.4e-22	0.0865	0.4952	0.00884642	0.00374078	471.137
rs7121958	G	T	8.9e-19	0.078	0.5105	0.00881542	0.00304066	382.69
rs4813802	G	T	2.3e-18	0.0819	0.3561	0.00936908	0.00307601	387.154
rs75954926	G	A	2.6e-18	0.0882	0.6568	0.0101058	0.0035071	441.602
rs11190164	G	A	1e-17	0.0889	0.2626	0.0103686	0.00306077	385.23
rs704017	G	A	1.8e-17	0.0765	0.5846	0.00899363	0.00284235	357.661
rs189583	G	C	1.1e-16	0.0795	0.3298	0.00958587	0.00279395	351.554
rs35470271	G	A	1.2e-16	0.0994	0.154	0.0120003	0.00257451	323.87
rs6678517	A	G	2.4e-16	0.073	0.5898	0.00890223	0.00257855	324.38
rs597808	G	A	2.6e-16	0.0737	0.5166	0.00899816	0.00271285	341.321
rs61389091	C	T	3.7e-16	0.1934	0.9606	0.0237359	0.00283127	356.263
rs17011141	G	A	6.1e-16	0.0877	0.2087	0.0108442	0.00254035	319.562
rs6983267	G	T	1.1e-15	0.1052	0.5228	0.0131251	0.00552201	696.722
rs3217810	T	C	1.6e-15	0.1181	0.1253	0.01482	0.00305731	384.793
rs4976270	C	T	4.8e-15	0.0693	0.5501	0.00884826	0.00237714	298.982
rs6066825	A	G	5.9e-15	0.0719	0.6448	0.00921078	0.00236802	297.833
rs9271695	G	A	4.9e-14	0.0889	0.7954	0.011799	0.00257232	323.594
rs7300312	C	T	8.1e-14	0.066	0.5719	0.0088369	0.00213296	268.206
rs56324967	C	T	2.4e-13	0.0689	0.6757	0.00940693	0.00208051	261.596
rs11087784	G	A	3.4e-13	0.0874	0.1523	0.0120096	0.0019724	247.976
rs7333607	G	A	6.3e-13	0.0758	0.235	0.0105368	0.00206584	259.748
rs1078643	A	G	6.6e-12	0.0748	0.7636	0.0108942	0.00201998	253.97
rs62404966	C	T	1.1e-11	0.0724	0.7623	0.0106584	0.0018996	238.806
rs174533	G	A	1.2e-11	0.0636	0.6739	0.00938024	0.00177783	223.471
rs12246635	C	T	1.3e-11	0.0975	0.0983	0.0144047	0.00168521	211.809
rs3731861	T	C	1.5e-11	0.0613	0.6295	0.00908431	0.00175281	220.32
rs12144319	C	T	3.3e-11	0.0665	0.2548	0.0100264	0.00167937	211.073
rs983402	T	C	3.7e-11	0.0627	0.3312	0.00947757	0.00174161	218.91
rs17816465	A	G	1.5e-10	0.0705	0.2055	0.0110064	0.00162298	203.975
rs2516420	C	T	1.8e-10	0.1118	0.9263	0.0175304	0.0017066	214.502
rs34797592	T	C	4.2e-10	0.0868	0.1182	0.013896	0.00157057	197.377
rs10821907	C	T	5e-10	0.073	0.8276	0.011738	0.00152066	191.096
rs2186607	T	A	1.1e-09	0.0537	0.5178	0.00881169	0.00144002	180.947
rs11610543	G	A	1.3e-09	0.053	0.5013	0.00873521	0.00140449	176.476
rs4313119	G	T	1.8e-09	0.0608	0.7486	0.0101082	0.0013914	174.829
rs8000189	T	C	1.8e-09	0.0549	0.6401	0.00912734	0.00138869	174.488
rs10980628	C	T	2.8e-09	0.0637	0.2106	0.0107186	0.00134916	169.515
rs6063514	C	T	3.3e-09	0.0547	0.6086	0.00924622	0.00142547	179.116
rs10049390	A	G	3.8e-09	0.0597	0.7353	0.0101312	0.00138739	174.324
rs4360494	G	C	3.8e-09	0.0523	0.4539	0.00887543	0.00135602	170.378
rs2250430	T	A	4.1e-09	0.0597	0.7095	0.0101529	0.00146919	184.618
rs7708610	A	G	4.2e-09	0.0545	0.3564	0.00927483	0.00136263	171.209
rs11884596	C	T	5e-09	0.0535	0.3823	0.00914972	0.00135182	169.849
rs983318	A	G	5.6e-09	0.0595	0.2526	0.0102088	0.00133675	167.953
rs6031311	T	C	6.8e-09	0.0597	0.7591	0.0103006	0.00130351	163.771
rs4759277	A	C	9.4e-09	0.053	0.3546	0.0092315	0.00128573	161.535
rs13149359	A	C	1.2e-08	0.052	0.3663	0.00912325	0.00125533	157.71
rs1537372	G	T	1.4e-08	0.0504	0.5692	0.00888358	0.00124575	156.506
rs72942485	G	A	1.4e-08	0.1761	0.9802	0.0310396	0.00120373	151.22
rs1391441	A	G	1.6e-08	0.0522	0.672	0.00923815	0.0012012	150.901
rs9930005	C	A	2.1e-08	0.0498	0.4303	0.00888722	0.00121592	152.754
rs78341008	C	T	2.6e-08	0.0982	0.0719	0.0176414	0.00128699	161.694
rs12149163	T	C	2.8e-08	0.0487	0.4976	0.00876924	0.00118582	148.967
rs11727676	C	T	2.9e-08	0.0842	0.098	0.0151784	0.00125339	157.467
rs34405347	T	G	3.1e-08	0.0818	0.9034	0.0147768	0.00116787	146.71
rs9924886	A	C	3.1e-08	0.055	0.7321	0.00993552	0.00118658	149.064
rs16878812	A	G	3.6e-08	0.0778	0.8861	0.0141212	0.00122179	153.491
rs73068325	T	C	4.2e-08	0.0632	0.1826	0.0115282	0.00119234	149.787
rs448513	C	T	4.4e-08	0.0511	0.326	0.00933505	0.00114749	144.147
rs12672022	T	C	4.7e-08	0.065	0.8345	0.0118997	0.00116703	146.604

## Sheet: Table S4
Table S4. Outcome data sources of outcome and download links.
Outcome	Data Source	Cases	Controls	Download link
Colorectal cancer	FinnGen	5458	259583	https://storage.googleapis.com/finngen-public-data-r8/summary_stats/finngen_R8_C3_COLORECTAL_EXALLC.gz
	UK Biobank	5693	386740	https://pan-ukb-us-east-1.s3.amazonaws.com/sumstats_flat_files/phecode-153-both_sexes.tsv.bgz
Colon cancer	FinnGen	3292	259583	https://storage.googleapis.com/finngen-public-data-r8/summary_stats/finngen_R8_C3_COLON_EXALLC.gz
	UK Biobank	3856	386740	https://pan-ukb-us-east-1.s3.amazonaws.com/sumstats_flat_files/phecode-153.2-both_sexes.tsv.bgz
Rectum cancer	FinnGen	2017	259583	https://storage.googleapis.com/finngen-public-data-r8/summary_stats/finngen_R8_C3_RECTUM_EXALLC.gz
	UK Biobank	2705	386740	https://pan-ukb-us-east-1.s3.amazonaws.com/sumstats_flat_files/phecode-153.3-both_sexes.tsv.bgz
Diverticular disease	Meta-analysi of GWAS	31964	419135	http://ftp.ebi.ac.uk/pub/databases/gwas/summary_statistics/GCST008001-GCST009000/GCST008105/

## Sheet: Table S5
Table S5. The SNPs used in Mendelian randomization analysis and colorectal cancer estimates in the FinnGen Biobank
rsids	pval.exposure	beta.exposure	effect_allele.exposure	other_allele.exposure	eaf.exposure	se.exposure	ref.outcome	alt.outcome	pval.outcome	beta.outcome	sebeta.outcome	af_alt.outcome
rs10471645	2.1e-11	0.0293838	C	T	0.175	0.0101	T	C	0.173159	-0.0359176	0.0263688	0.825774
rs10472291	3.8e-11	0.0253059	C	A	0.346	0.00881304	C	A	0.36285	-0.0185557	0.020392	0.380282
rs112609918	2.9e-12	0.0569049	A	T	0.052	0.0187653	A	T	0.0515241	-0.0726732	0.0373241	0.079429
rs1473813	2.9e-08	-0.0177288	G	A	0.38	0.0073588	G	A	0.367429	-0.0186774	0.0207228	0.351481
rs17309930	6.8e-17	-0.0362122	C	A	0.195	0.00998528	C	A	0.128084	-0.0352528	0.0231667	0.239329
rs1802575	3.7e-19	0.045323	G	C	0.145	0.0116661	G	C	0.371957	0.0343012	0.0384193	0.0726366
rs1888693	2.7e-10	-0.0222764	G	A	0.332	0.00812233	G	A	0.25381	0.0232204	0.0203483	0.385458
rs1973232	2.9e-09	0.0253059	A	G	0.193	0.00981427	G	A	0.56776	-0.0154644	0.0270662	0.84177
rs2049865	4.9e-08	-0.0177288	A	C	0.41	0.00748354	C	A	0.87424	0.00334449	0.0211309	0.673638
rs208814	9e-09	0.0211893	G	A	0.366	0.00848735	A	G	0.455524	0.0162348	0.0217556	0.710791
rs2131755	1.5e-11	0.0253059	A	G	0.421	0.00863512	A	G	0.323445	0.020017	0.0202723	0.395048
rs2280028	4.1e-12	-0.0315171	G	A	0.132	0.0104664	G	A	0.558708	-0.0194067	0.0331874	0.0958055
rs2784255	2e-08	-0.0177288	T	C	0.473	0.00727405	T	C	0.105583	0.0320311	0.0197922	0.474839
rs3113037	1e-11	0.0253059	C	T	0.244	0.00856077	C	T	7.18605e-05	-0.0908362	0.0228804	0.257565
rs34126945	1.2e-08	-0.0177288	A	G	0.323	0.0071621	A	G	0.710065	0.00865449	0.0232793	0.235605
rs3732760	1.7e-11	0.0253059	A	C	0.387	0.00865846	A	C	0.303288	0.0204296	0.0198459	0.44902
rs3775010	6.8e-10	0.0211893	T	C	0.37	0.00790678	T	C	0.278203	0.0232491	0.0214403	0.306891
rs387505	2.9e-08	0.0170333	C	T	0.449	0.00707015	T	C	0.643068	-0.00915944	0.0197652	0.504196
rs4132788	1.1e-08	0.0211893	C	T	0.27	0.0085379	C	T	0.480338	-0.0151282	0.0214354	0.305651
rs4333882	2.5e-24	0.0413927	A	G	0.207	0.00936483	A	G	0.234111	-0.0266922	0.0224335	0.263587
rs4802297	2e-16	0.0253059	C	G	0.498	0.00708688	G	C	0.275987	-0.0219442	0.0201437	0.596556
rs4871180	1.1e-09	0.0253059	C	T	0.256	0.0095614	C	T	0.0233545	-0.047066	0.020756	0.349479
rs61814883	3.2e-11	-0.0222764	G	A	0.286	0.00772832	G	A	0.339808	-0.0217991	0.0228372	0.249198
rs61823192	4.6e-14	-0.0757207	C	T	0.025	0.0231152	C	T	0.275084	0.11483	0.105211	0.00885519
rs6714546	2.4e-08	0.0211893	G	A	0.301	0.00874317	A	G	0.210958	-0.0291668	0.023316	0.761914
rs6734367	4.4e-55	0.0681859	G	T	0.201	0.0100437	T	G	0.120934	0.0397978	0.0256617	0.818035
rs7077800	1.7e-22	-0.0315171	C	T	0.457	0.00743683	C	T	0.430543	0.0156519	0.0198563	0.443565
rs7098322	6e-14	0.0374265	T	C	0.134	0.011478	C	T	0.471479	0.0225547	0.0313227	0.888763
rs71472433	6.1e-11	0.0293838	A	C	0.176	0.0103434	A	C	0.00340157	-0.0831178	0.0283784	0.148392
rs7609897	5.6e-22	-0.0409586	G	T	0.199	0.00978669	G	T	0.363182	0.0211286	0.0232356	0.249366
rs7624168	2.3e-08	-0.0222764	G	A	0.215	0.00917956	A	G	0.287569	-0.0241491	0.0227078	0.745808
rs8074740	2.4e-10	0.0211893	G	A	0.334	0.00770377	G	A	0.0887912	-0.0371082	0.0218051	0.285874
rs875107	3.7e-09	0.0211893	A	C	0.496	0.00827362	C	A	0.321167	-0.0202749	0.0204372	0.626749
rs9482094	1.6e-11	-0.0222764	G	A	0.359	0.00761194	A	G	0.247072	-0.0247488	0.0213814	0.688716
rs9520339	1.1e-14	-0.0315171	C	T	0.227	0.00939168	C	T	0.0857828	0.0404308	0.0235327	0.227247
rs9555371	1.2e-13	-0.0315171	A	G	0.187	0.00978466	A	G	0.147838	0.0345868	0.0238989	0.222781
rs9960286	2.3e-10	0.0253059	A	G	0.254	0.00919091	A	G	0.667666	-0.0103458	0.0240961	0.214069

## Sheet: Table S6
Table S6. The SNPs used in Mendelian randomization analysis and colorectal cancer estimates in the UK Biobank
rsids	pval.exposure	beta.exposure	effect_allele.exposure	other_allele.exposure	eaf.exposure	se.exposure	ref.outcome	alt.outcome	beta_EUR	se_EUR	pval_EUR	P_EUR
rs61814883	3.2e-11	-0.0222764	G	A	0.286	0.00772832	G	A	8.58e-06	0.02093	-0.0003272	0.999247
rs61823192	4.6e-14	-0.0757207	C	T	0.025	0.0231152	C	T	-0.03741	0.05905	-0.6418	0.228139
rs2784255	2e-08	-0.0177288	T	C	0.473	0.00727405	T	C	0.01154	0.01915	-0.6038	0.249
rs4333882	2.5e-24	0.0413927	A	G	0.207	0.00936483	A	G	-0.05303	0.02469	-3.451	0.000353997
rs7098322	6e-14	0.0374265	T	C	0.134	0.011478	C	T	0.07638	0.02896	-4.786	1.63682e-05
rs1888693	2.7e-10	-0.0222764	G	A	0.332	0.00812233	G	A	0.04248	0.02021	-3.335	0.000462381
rs7077800	1.7e-22	-0.0315171	C	T	0.457	0.00743683	C	T	0.01152	0.01916	-0.6022	0.249919
rs17309930	6.8e-17	-0.0362122	C	A	0.195	0.00998528	C	A	-0.006512	0.02363	-0.2448	0.569115
rs875107	3.7e-09	0.0211893	A	C	0.496	0.00827362	C	A	-0.004179	0.0192	-0.1891	0.646994
rs9520339	1.1e-14	-0.0315171	C	T	0.227	0.00939168	C	T	-0.02434	0.02254	-1.272	0.0534564
rs9555371	1.2e-13	-0.0315171	A	G	0.187	0.00978466	A	G	0.0376	0.02415	-2.124	0.00751623
rs1473813	2.9e-08	-0.0177288	G	A	0.38	0.0073588	G	A	0.000875	0.01977	-0.03595	0.920556
rs71472433	6.1e-11	0.0293838	A	C	0.176	0.0103434	A	C	0.00357	0.02579	-0.1166	0.76454
rs387505	2.9e-08	0.0170333	C	T	0.449	0.00707015	T	C	-0.007149	0.01938	-0.3393	0.457826
rs2056544	9.8e-11	-0.0222764	A	G	0.412	0.00792786	G	A	0.05367	0.01972	-5.037	9.18333e-06
rs2131755	1.5e-11	0.0253059	A	G	0.421	0.00863512	A	G	0.002353	0.01953	-0.1008	0.792866
rs2280028	4.1e-12	-0.0315171	G	A	0.132	0.0104664	G	A	-0.01323	0.0276	-0.4592	0.347376
rs8074740	2.4e-10	0.0211893	G	A	0.334	0.00770377	G	A	-0.0172	0.02055	-0.9098	0.123084
rs1973232	2.9e-09	0.0253059	A	G	0.193	0.00981427	G	A	-0.04044	0.02477	-2.278	0.0052723
rs9960286	2.3e-10	0.0253059	A	G	0.254	0.00919091	A	G	0.02114	0.02229	-1.07	0.0851138
rs4802297	2e-16	0.0253059	C	G	0.498	0.00708688	G	C	-0.01678	0.01917	-0.9636	0.108743
rs6734367	4.4e-55	0.0681859	G	T	0.201	0.0100437	T	G	0.06333	0.02496	-4.495	3.1989e-05
rs62125298	1e-08	-0.0268721	G	T	0.161	0.0107971	G	T	0.002414	0.02537	-0.07885	0.833969
rs6714546	2.4e-08	0.0211893	G	A	0.301	0.00874317	A	G	-0.001524	0.02114	-0.05918	0.87261
rs1802575	3.7e-19	0.045323	G	C	0.145	0.0116661	G	C	-0.009306	0.02823	-0.2989	0.502458
rs208814	9e-09	0.0211893	G	A	0.366	0.00848735	A	G	-0.01329	0.02006	-0.6777	0.210039
rs6001870	4.3e-09	0.0211893	A	C	0.361	0.00830864	A	C	0.01717	0.02037	-0.9179	0.120809
rs3732760	1.7e-11	0.0253059	A	C	0.387	0.00865846	A	C	-0.05274	0.01986	-4.838	1.45211e-05
rs7609897	5.6e-22	-0.0409586	G	T	0.199	0.00978669	G	T	0.01761	0.02455	-0.7485	0.178443
rs7624168	2.3e-08	-0.0222764	G	A	0.215	0.00917956	A	G	-0.02214	0.02321	-1.078	0.0835603
rs4132788	1.1e-08	0.0211893	C	T	0.27	0.0085379	C	T	0.003907	0.02181	-0.1533	0.702587
rs3775010	6.8e-10	0.0211893	T	C	0.37	0.00790678	T	C	-0.007613	0.02005	-0.3508	0.445862
rs34126945	1.2e-08	-0.0177288	A	G	0.323	0.0071621	A	G	-0.03059	0.02029	-2.028	0.00937562
rs10472291	3.8e-11	0.0253059	C	A	0.346	0.00881304	C	A	-0.03236	0.02034	-2.192	0.00642688
rs10471645	2.1e-11	0.0293838	C	T	0.175	0.0101	T	C	0.01789	0.02573	-0.7195	0.190766
rs7990	1.4e-08	0.0293838	C	A	0.105	0.0119256	C	A	0.03532	0.02924	-1.483	0.0328852
rs9482094	1.6e-11	-0.0222764	G	A	0.359	0.00761194	A	G	0.03969	0.0199	-3.077	0.000837529
rs112609918	2.9e-12	0.0569049	A	T	0.052	0.0187653	A	T	0.06495	0.04583	-1.855	0.0139637
rs3113037	1e-11	0.0253059	C	T	0.244	0.00856077	C	T	0.004341	0.0227	-0.1645	0.684699
rs2049865	4.9e-08	-0.0177288	A	C	0.41	0.00748354	C	A	0.03691	0.01955	-2.83	0.00147911
rs60869342	4.4e-13	-0.0268721	A	T	0.23	0.0085432	A	T	0.002937	0.0219	-0.1128	0.771259
rs4871180	1.1e-09	0.0253059	C	T	0.256	0.0095614	C	T	-0.001119	0.02239	-0.04067	0.910605
rs505922	4.5e-15	-0.0268721	T	C	0.302	0.00789212	T	C	0.02249	0.02068	-1.285	0.05188

## Sheet: Table S7
Table S7. The SNPs used in Mendelian randomization analysis and colon cancer estimates in the FinnGen Biobank
rsids	pval.exposure	beta.exposure	effect_allele.exposure	other_allele.exposure	eaf.exposure	se.exposure	ref.outcome	alt.outcome	pval.outcome	beta.outcome	sebeta.outcome	af_alt.outcome
rs10471645	2.1e-11	0.0293838	C	T	0.175	0.0101	T	C	0.564249	-0.0194157	0.0336761	0.825822
rs10472291	3.8e-11	0.0253059	C	A	0.346	0.00881304	C	A	0.421325	-0.0208682	0.0259514	0.38033
rs112609918	2.9e-12	0.0569049	A	T	0.052	0.0187653	A	T	0.279189	-0.0513594	0.0474608	0.0795122
rs1473813	2.9e-08	-0.0177288	G	A	0.38	0.0073588	G	A	0.282394	-0.0283459	0.0263694	0.351463
rs17309930	6.8e-17	-0.0362122	C	A	0.195	0.00998528	C	A	0.0084922	-0.0784676	0.0298146	0.239295
rs1802575	3.7e-19	0.045323	G	C	0.145	0.0116661	G	C	0.320091	0.0485142	0.0487937	0.0726444
rs1888693	2.7e-10	-0.0222764	G	A	0.332	0.00812233	G	A	0.192444	0.0337768	0.0259147	0.385464
rs1973232	2.9e-09	0.0253059	A	G	0.193	0.00981427	G	A	0.892385	0.00466296	0.0344671	0.841843
rs2049865	4.9e-08	-0.0177288	A	C	0.41	0.00748354	C	A	0.798071	0.00688579	0.026914	0.673664
rs208814	9e-09	0.0211893	G	A	0.366	0.00848735	A	G	0.18363	0.036859	0.0277206	0.710827
rs2131755	1.5e-11	0.0253059	A	G	0.421	0.00863512	A	G	0.0654938	0.0475821	0.0258335	0.395101
rs2280028	4.1e-12	-0.0315171	G	A	0.132	0.0104664	G	A	0.383619	-0.0368365	0.0422802	0.095774
rs2784255	2e-08	-0.0177288	T	C	0.473	0.00727405	T	C	0.345156	0.0237972	0.0252082	0.474763
rs3113037	1e-11	0.0253059	C	T	0.244	0.00856077	C	T	0.000505173	-0.101447	0.0291684	0.257687
rs34126945	1.2e-08	-0.0177288	A	G	0.323	0.0071621	A	G	0.456199	0.0220658	0.0296137	0.235615
rs3732760	1.7e-11	0.0253059	A	C	0.387	0.00865846	A	C	0.296064	0.0264152	0.0252798	0.449044
rs3775010	6.8e-10	0.0211893	T	C	0.37	0.00790678	T	C	0.599632	0.0143391	0.0273163	0.306837
rs387505	2.9e-08	0.0170333	C	T	0.449	0.00707015	T	C	0.239134	-0.029624	0.0251657	0.504166
rs4132788	1.1e-08	0.0211893	C	T	0.27	0.0085379	C	T	0.686798	-0.0110105	0.0273074	0.30567
rs4333882	2.5e-24	0.0413927	A	G	0.207	0.00936483	A	G	0.133849	-0.0429036	0.0286197	0.263583
rs4802297	2e-16	0.0253059	C	G	0.498	0.00708688	G	C	0.158126	-0.0361635	0.0256224	0.596581
rs4871180	1.1e-09	0.0253059	C	T	0.256	0.0095614	C	T	0.0644674	-0.0488618	0.0264271	0.349551
rs61814883	3.2e-11	-0.0222764	G	A	0.286	0.00772832	G	A	0.444972	-0.0222276	0.0291004	0.249229
rs61823192	4.6e-14	-0.0757207	C	T	0.025	0.0231152	C	T	0.544707	0.0808896	0.133545	0.00883813
rs6714546	2.4e-08	0.0211893	G	A	0.301	0.00874317	A	G	0.20741	-0.0374117	0.0296749	0.761928
rs6734367	4.4e-55	0.0681859	G	T	0.201	0.0100437	T	G	0.170265	0.0448206	0.0326835	0.817988
rs7077800	1.7e-22	-0.0315171	C	T	0.457	0.00743683	C	T	0.116353	0.039694	0.0252785	0.443597
rs7098322	6e-14	0.0374265	T	C	0.134	0.011478	C	T	0.321718	0.0394704	0.0398316	0.888773
rs71472433	6.1e-11	0.0293838	A	C	0.176	0.0103434	A	C	0.0113569	-0.0898841	0.035506	0.148474
rs7609897	5.6e-22	-0.0409586	G	T	0.199	0.00978669	G	T	0.470616	0.0213519	0.0295947	0.249372
rs7624168	2.3e-08	-0.0222764	G	A	0.215	0.00917956	A	G	0.075631	-0.0514319	0.0289493	0.745771
rs8074740	2.4e-10	0.0211893	G	A	0.334	0.00770377	G	A	0.0889283	-0.0473082	0.0278107	0.285906
rs875107	3.7e-09	0.0211893	A	C	0.496	0.00827362	C	A	0.183377	-0.0346491	0.0260435	0.626742
rs9482094	1.6e-11	-0.0222764	G	A	0.359	0.00761194	A	G	0.6243	-0.0133335	0.0272243	0.688774
rs9520339	1.1e-14	-0.0315171	C	T	0.227	0.00939168	C	T	0.106604	0.0483938	0.0299903	0.227186
rs9555371	1.2e-13	-0.0315171	A	G	0.187	0.00978466	A	G	0.39447	0.0259126	0.0304303	0.222719
rs9960286	2.3e-10	0.0253059	A	G	0.254	0.00919091	A	G	0.364648	-0.0278324	0.0307017	0.214048

## Sheet: Table S8
Table S8. The SNPs used in Mendelian randomization analysis and colon cancer estimates in the UK Biobank
rsids	pval.exposure	beta.exposure	effect_allele.exposure	other_allele.exposure	eaf.exposure	se.exposure	ref.outcome	alt.outcome	beta_EUR	se_EUR	pval_EUR	P_EUR
rs61814883	3.2e-11	-0.0222764	G	A	0.286	0.00772832	G	A	0.04225	0.0253	-2.355	0.0044157
rs61823192	4.6e-14	-0.0757207	C	T	0.025	0.0231152	C	T	0.0803	0.07136	-1.345	0.0451856
rs2784255	2e-08	-0.0177288	T	C	0.473	0.00727405	T	C	0.01929	0.02316	-0.9042	0.124681
rs4333882	2.5e-24	0.0413927	A	G	0.207	0.00936483	A	G	-0.004323	0.02986	-0.1223	0.754571
rs7098322	6e-14	0.0374265	T	C	0.134	0.011478	C	T	0.07028	0.03501	-3.107	0.000781628
rs1888693	2.7e-10	-0.0222764	G	A	0.332	0.00812233	G	A	0.03899	0.02445	-2.2	0.00630957
rs7077800	1.7e-22	-0.0315171	C	T	0.457	0.00743683	C	T	0.01742	0.02318	-0.7936	0.160842
rs17309930	6.8e-17	-0.0362122	C	A	0.195	0.00998528	C	A	0.01183	0.02859	-0.3869	0.410299
rs875107	3.7e-09	0.0211893	A	C	0.496	0.00827362	C	A	-0.009539	0.02322	-0.3839	0.413143
rs9520339	1.1e-14	-0.0315171	C	T	0.227	0.00939168	C	T	-0.03698	0.02727	-1.743	0.0180717
rs9555371	1.2e-13	-0.0315171	A	G	0.187	0.00978466	A	G	0.02989	0.02923	-1.182	0.0657658
rs1473813	2.9e-08	-0.0177288	G	A	0.38	0.0073588	G	A	0.01451	0.02391	-0.6091	0.24598
rs71472433	6.1e-11	0.0293838	A	C	0.176	0.0103434	A	C	0.000912	0.03121	-0.02359	0.947131
rs387505	2.9e-08	0.0170333	C	T	0.449	0.00707015	T	C	0.005268	0.02345	-0.1958	0.637089
rs2056544	9.8e-11	-0.0222764	A	G	0.412	0.00792786	G	A	0.05269	0.02385	-3.606	0.000247742
rs2131755	1.5e-11	0.0253059	A	G	0.421	0.00863512	A	G	0.01754	0.02362	-0.7815	0.165386
rs2280028	4.1e-12	-0.0315171	G	A	0.132	0.0104664	G	A	-0.01843	0.0334	-0.543	0.286418
rs8074740	2.4e-10	0.0211893	G	A	0.334	0.00770377	G	A	-0.006891	0.02485	-0.2465	0.566892
rs1973232	2.9e-09	0.0253059	A	G	0.193	0.00981427	G	A	-0.0636	0.02996	-3.387	0.000410204
rs9960286	2.3e-10	0.0253059	A	G	0.254	0.00919091	A	G	0.04093	0.02696	-2.049	0.00893305
rs4802297	2e-16	0.0253059	C	G	0.498	0.00708688	G	C	-0.02864	0.02319	-1.529	0.0295801
rs6734367	4.4e-55	0.0681859	G	T	0.201	0.0100437	T	G	0.05597	0.03019	-2.753	0.00176604
rs62125298	1e-08	-0.0268721	G	T	0.161	0.0107971	G	T	0.01863	0.03068	-0.6095	0.245754
rs6714546	2.4e-08	0.0211893	G	A	0.301	0.00874317	A	G	0.004081	0.02557	-0.1356	0.731813
rs1802575	3.7e-19	0.045323	G	C	0.145	0.0116661	G	C	-0.003562	0.03414	-0.08676	0.818917
rs208814	9e-09	0.0211893	G	A	0.366	0.00848735	A	G	0.005227	0.02427	-0.1869	0.650279
rs6001870	4.3e-09	0.0211893	A	C	0.361	0.00830864	A	C	0.03422	0.02464	-1.802	0.0157761
rs3732760	1.7e-11	0.0253059	A	C	0.387	0.00865846	A	C	-0.05833	0.02402	-4.188	6.48634e-05
rs7609897	5.6e-22	-0.0409586	G	T	0.199	0.00978669	G	T	-0.01103	0.02971	-0.3418	0.455198
rs7624168	2.3e-08	-0.0222764	G	A	0.215	0.00917956	A	G	-0.03728	0.02808	-1.691	0.0203704
rs4132788	1.1e-08	0.0211893	C	T	0.27	0.0085379	C	T	-0.004634	0.02638	-0.1502	0.70762
rs3775010	6.8e-10	0.0211893	T	C	0.37	0.00790678	T	C	0.01499	0.02425	-0.6227	0.238397
rs34126945	1.2e-08	-0.0177288	A	G	0.323	0.0071621	A	G	-0.00996	0.02454	-0.3786	0.418215
rs10472291	3.8e-11	0.0253059	C	A	0.346	0.00881304	C	A	-0.02305	0.0246	-1.053	0.0885116
rs10471645	2.1e-11	0.0293838	C	T	0.175	0.0101	T	C	0.02395	0.03111	-0.8179	0.15209
rs7990	1.4e-08	0.0293838	C	A	0.105	0.0119256	C	A	0.03453	0.03539	-1.111	0.0774462
rs9482094	1.6e-11	-0.0222764	G	A	0.359	0.00761194	A	G	0.036	0.02407	-2.004	0.00990832
rs112609918	2.9e-12	0.0569049	A	T	0.052	0.0187653	A	T	0.02675	0.05546	-0.4627	0.344588
rs3113037	1e-11	0.0253059	C	T	0.244	0.00856077	C	T	-0.02799	0.02746	-1.178	0.0663743
rs2049865	4.9e-08	-0.0177288	A	C	0.41	0.00748354	C	A	0.03088	0.02364	-1.654	0.022182
rs60869342	4.4e-13	-0.0268721	A	T	0.23	0.0085432	A	T	0.01403	0.02648	-0.5171	0.304018
rs4871180	1.1e-09	0.0253059	C	T	0.256	0.0095614	C	T	-0.006319	0.02708	-0.2039	0.625317
rs505922	4.5e-15	-0.0268721	T	C	0.302	0.00789212	T	C	0.01061	0.02503	-0.3982	0.399761

## Sheet: Table S9
Table S9. The SNPs used in Mendelian randomization analysis and rectum cancer estimates in the FinnGen Biobank
rsids	pval.exposure	beta.exposure	effect_allele.exposure	other_allele.exposure	eaf.exposure	se.exposure	ref.outcome	alt.outcome	pval.outcome	beta.outcome	sebeta.outcome	af_alt.outcome
rs10471645	2.1e-11	0.0293838	C	T	0.175	0.0101	T	C	0.335694	-0.0410576	0.042648	0.825792
rs10472291	3.8e-11	0.0253059	C	A	0.346	0.00881304	C	A	0.416294	-0.0268127	0.0329853	0.380359
rs112609918	2.9e-12	0.0569049	A	T	0.052	0.0187653	A	T	0.292213	-0.0634489	0.0602395	0.0795354
rs1473813	2.9e-08	-0.0177288	G	A	0.38	0.0073588	G	A	0.694188	-0.0131709	0.0334985	0.351484
rs17309930	6.8e-17	-0.0362122	C	A	0.195	0.00998528	C	A	0.584812	0.0204435	0.037417	0.239497
rs1802575	3.7e-19	0.045323	G	C	0.145	0.0116661	G	C	0.892807	0.00839516	0.0623002	0.0726043
rs1888693	2.7e-10	-0.0222764	G	A	0.332	0.00812233	G	A	0.875857	-0.00514256	0.0329181	0.385342
rs1973232	2.9e-09	0.0253059	A	G	0.193	0.00981427	G	A	0.729142	-0.0150998	0.0436074	0.841825
rs2049865	4.9e-08	-0.0177288	A	C	0.41	0.00748354	C	A	0.953896	0.00197614	0.0341805	0.673682
rs208814	9e-09	0.0211893	G	A	0.366	0.00848735	A	G	0.726049	-0.0123035	0.035114	0.710702
rs2131755	1.5e-11	0.0253059	A	G	0.421	0.00863512	A	G	0.535908	-0.020272	0.032749	0.394933
rs2280028	4.1e-12	-0.0315171	G	A	0.132	0.0104664	G	A	0.832211	0.0113731	0.0536804	0.0958068
rs2784255	2e-08	-0.0177288	T	C	0.473	0.00727405	T	C	0.474122	0.0229134	0.0320113	0.474728
rs3113037	1e-11	0.0253059	C	T	0.244	0.00856077	C	T	0.134887	-0.054665	0.0365627	0.257843
rs34126945	1.2e-08	-0.0177288	A	G	0.323	0.0071621	A	G	0.641319	-0.0175462	0.0376645	0.235535
rs3732760	1.7e-11	0.0253059	A	C	0.387	0.00865846	A	C	0.582145	0.0176445	0.0320661	0.449016
rs3775010	6.8e-10	0.0211893	T	C	0.37	0.00790678	T	C	0.116021	0.0544671	0.034655	0.306894
rs387505	2.9e-08	0.0170333	C	T	0.449	0.00707015	T	C	0.276864	0.0348041	0.0320069	0.504342
rs4132788	1.1e-08	0.0211893	C	T	0.27	0.0085379	C	T	0.719809	-0.01242	0.0346237	0.305671
rs4333882	2.5e-24	0.0413927	A	G	0.207	0.00936483	A	G	0.978657	0.000970108	0.0362627	0.263694
rs4802297	2e-16	0.0253059	C	G	0.498	0.00708688	G	C	0.390197	-0.0279974	0.0325831	0.59665
rs4871180	1.1e-09	0.0253059	C	T	0.256	0.0095614	C	T	0.318263	-0.0334872	0.0335532	0.34963
rs61814883	3.2e-11	-0.0222764	G	A	0.286	0.00772832	G	A	0.255698	-0.0419351	0.0368946	0.249227
rs61823192	4.6e-14	-0.0757207	C	T	0.025	0.0231152	C	T	0.240293	0.199261	0.169691	0.00883813
rs6714546	2.4e-08	0.0211893	G	A	0.301	0.00874317	A	G	0.380052	-0.0330958	0.0377031	0.761956
rs6734367	4.4e-55	0.0681859	G	T	0.201	0.0100437	T	G	0.240128	0.0487076	0.0414651	0.817956
rs7077800	1.7e-22	-0.0315171	C	T	0.457	0.00743683	C	T	0.666107	-0.0138442	0.0320842	0.44344
rs7098322	6e-14	0.0374265	T	C	0.134	0.011478	C	T	0.92608	0.00469458	0.0506001	0.888736
rs71472433	6.1e-11	0.0293838	A	C	0.176	0.0103434	A	C	0.0493992	-0.0889229	0.0452503	0.148518
rs7609897	5.6e-22	-0.0409586	G	T	0.199	0.00978669	G	T	0.77236	0.0108895	0.0376423	0.249356
rs7624168	2.3e-08	-0.0222764	G	A	0.215	0.00917956	A	G	0.536368	0.0226528	0.0366364	0.745909
rs8074740	2.4e-10	0.0211893	G	A	0.334	0.00770377	G	A	0.608627	-0.018012	0.0351773	0.285999
rs875107	3.7e-09	0.0211893	A	C	0.496	0.00827362	C	A	0.591653	-0.0177151	0.0330233	0.62682
rs9482094	1.6e-11	-0.0222764	G	A	0.359	0.00761194	A	G	0.275807	-0.0376695	0.0345659	0.688728
rs9520339	1.1e-14	-0.0315171	C	T	0.227	0.00939168	C	T	0.139615	0.0563135	0.0381211	0.22714
rs9555371	1.2e-13	-0.0315171	A	G	0.187	0.00978466	A	G	0.225455	0.04691	0.0386998	0.222728
rs9960286	2.3e-10	0.0253059	A	G	0.254	0.00919091	A	G	0.554852	0.0229701	0.0388991	0.214138

[truncated: 8 more sheets: Table S10, Table S11, Table S12, Table S13, Table S14, Table S15, Table S16, Figure S1]
